# Supplementary material
Source: MDPI journal article supplement (https://www.mdpi.com/2071-1050/13/16/9020)
Supplement: s1 [file s1]

**Table S1:** Observed and certified values of heavy metals for SRM 1646a ( $\mu\text{g g}^{-1}$ , Fe %).

| Element | Observed value<br>(mean $\pm$ SD) | Certified value<br>(mean $\pm$ SD) | Recovery (%) |
|---------|-----------------------------------|------------------------------------|--------------|
| As      | 6.49 $\pm$ 0.36                   | 6.23 $\pm$ 0.21                    | 104.2        |
| Cd      | 0.16 $\pm$ 0.05                   | 0.15 $\pm$ 0.01                    | 106.6        |
| Cr      | 39.82 $\pm$ 2.18                  | 40.9 $\pm$ 1.9                     | 97.36        |
| Cu      | 8.98 $\pm$ 0.09                   | 10.01 $\pm$ 0.34                   | 89.71        |
| Fe      | 1.81 $\pm$ 0.07                   | 2.01 $\pm$ 0.04                    | 90.05        |
| Ni      | 21.86 $\pm$ 0.39                  | 23.00a                             | 95.04        |
| Pb      | 12.16 $\pm$ 0.83                  | 11.7 $\pm$ 1.2                     | 103.9        |
| Zn      | 45.21 $\pm$ 2.06                  | 48.9 $\pm$ 1.6                     | 92.45        |

aNon-certified value

**Table S2:** Descriptive classes of the geoaccumulation index (Igeo) and indication of enrichment factor (EF).

| Igeo value            | Class | Description of sediment quality   | Enrichment factor values    | indication of enrichment factor |
|-----------------------|-------|-----------------------------------|-----------------------------|---------------------------------|
| $\text{Igeo} \leq 0$  | 0     | practically unpolluted            | $\text{EF} < 1$             | no enrichment                   |
| $0 < \text{Igeo} < 1$ | 1     | unpolluted to moderately polluted | $\text{EF} < 3$             | minor enrichment                |
| $1 < \text{Igeo} < 2$ | 2     | moderately polluted               | $\text{EF} = 3\text{--}5$   | moderate enrichment             |
| $2 < \text{Igeo} < 3$ | 3     | moderately to heavily polluted    | $\text{EF} = 5\text{--}10$  | moderately severe enrichment    |
| $3 < \text{Igeo} < 4$ | 4     | heavily polluted                  | $\text{EF} = 10\text{--}25$ | severe enrichment               |
| $4 < \text{Igeo} < 5$ | 5     | heavily to extremely polluted     | $\text{EF} = 25\text{--}50$ | very severe enrichment          |
| $\text{Igeo} \geq 5$  | 6     | extremely polluted                | $\text{EF} > 50$            | extremely severe enrichment     |

**Table S3:** A comparison of Pb isotope ratios from different sources to those in sediments of SMART ponds.

| Samples                                       |         | $^{206}\text{Pb}/^{207}\text{Pb}$ | $^{208}\text{Pb}/^{207}\text{Pb}$ | Reference                |
|-----------------------------------------------|---------|-----------------------------------|-----------------------------------|--------------------------|
| <b>Manmade source</b>                         |         |                                   |                                   |                          |
| Coal in Indonesia                             |         | 1.184                             | 2.477                             | Díaz-Somoano et al. [1]  |
| Coal in Australia                             |         | 1.206                             | 2.488                             | Díaz-Somoano et al. [1]  |
| Coal in Shanghai                              |         | 1.182                             | 2.471                             | Zheng et al. [2]         |
| Coal in Beijing                               |         | 1.172                             | 2.46                              | Mukai et al. [3]         |
| Vehicle exhaust (leaded) in Shanghai          |         | 1.110                             | 2.435                             | Chen et al. [4]          |
| Vehicle exhaust (unleaded) in Shanghai        |         | 1.147                             | 2.436                             | Chen et al. [4]          |
| Vehicle exhaust (unleaded) in Chengdu         |         | 1.170                             | 2.461                             | Bi et al. [5]            |
| Aerosols in Singapore                         |         | 1.148                             | 2.425                             | Lee et al. [6]           |
| Aerosols in Delhi, India                      |         | 1.125                             | 2.404                             | Kumar et al. [7]         |
| Aerosols in Kuala Lumpur                      |         | 1.141                             | 2.410                             | Bollhöfer and Rosman [8] |
| Aerosols in Bangkok                           |         | 1.127                             | 2.404                             | Bollhöfer and Rosman [8] |
| Aerosols in Hanoi, Vietnam                    |         | 1.167                             | 2.453                             | Bollhöfer and Rosman [8] |
| Aerosol in Jakarta                            |         | 1.131                             | 2.395                             | Bollhöfer and Rosman [8] |
| Aerosol in Hong Kong                          |         | 1.161                             | 2.451                             | Lee et al. [9]           |
| Aerosol in Guangzhou                          |         | 1.168                             | 2.456                             | Lee et al. [9]           |
| Cement in Shanghai                            |         | 1.163                             | 2.447                             | Tan et al. [10]          |
| Industrial emissions in France                |         | 1.155                             | 2.112                             | Monna et al. [11]        |
| <b>Natural background source</b>              |         |                                   |                                   |                          |
| Volcanic rocks in Foshan,                     |         | 1.199                             | 2.497                             | Bing-Quan et al. [12]    |
| Granite in the Pearl River Delta              |         | 1.184                             | 2.482                             | Bing-Quan et al. [12]    |
| Uncontaminated soils in the Pearl River Delta |         | 1.195                             | 2.482                             | Lee et al. [9]           |
| Country Park soils in Hong Kong               |         | 1.200                             | 2.495                             | Lee et al. [9]           |
| <b>This study</b>                             |         |                                   |                                   |                          |
| HSP                                           | January | $1.178 \pm 0.003$                 | $2.449 \pm 0.008$                 |                          |
|                                               | March   | $1.181 \pm 0.002$                 | $2.493 \pm 0.005$                 |                          |
|                                               | May     | $1.184 \pm 0.001$                 | $2.456 \pm 0.001$                 |                          |
|                                               | mean    | $1.181 \pm 0.002$                 | $2.466 \pm 0.005$                 |                          |
| SSP                                           | January | $1.190 \pm 0.002$                 | $2.469 \pm 0.005$                 |                          |
|                                               | March   | $1.193 \pm 0.005$                 | $2.493 \pm 0.004$                 |                          |
|                                               | May     | $1.190 \pm 0.002$                 | $2.492 \pm 0.001$                 |                          |
|                                               | mean    | $1.191 \pm 0.003$                 | $2.485 \pm 0.003$                 |                          |

1. Díaz-Somoano, M., M.E. Kylander, M.A. López-Antón, I. Suárez-Ruiz, M.R. Martínez-Tarazona, M. Ferrat, .... & D.J. Weiss, *Stable lead isotope compositions in selected coals from around the world and implications for present day aerosol source tracing*. Environmental science & technology, 2009. **43**(4): p. 1078-1085.
2. Zheng, J., M. Tan, Y. Shibata, A. Tanaka, Y. Li, G. Zhang, .... & Z. Shan, *Characteristics of lead isotope ratios and elemental concentrations in PM<sub>10</sub> fraction of airborne particulate matter in Shanghai after the phase-out of leaded gasoline*. Atmospheric Environment, 2004. **38**(8): p. 1191-1200.
3. Mukai, H., A. Tanaka, T. Fujii, Y. Zeng, Y. Hong, J. Tang, .... & J. Zhou, *Regional characteristics of sulfur and lead isotope ratios in the atmosphere at several Chinese urban sites*. Environmental science technology, 2001. **35**(6): p. 1064-1071.
4. Chen, J., M. Tan, Y. Li, Y. Zhang, W. Lu, Y. Tong, .... & Y. Li, *A lead isotope record of Shanghai atmospheric lead emissions in total suspended particles during the period of phasing out of leaded gasoline*. Atmospheric Environment, 2005. **39**(7): p. 1245-1253.
5. Bi, X., S. Liang, and X. Li, *A novel in situ method for sampling urban soil dust: particle size distribution, trace metal concentrations, and stable lead isotopes*. Environmental pollution, 2013. **177**: p. 48-57.
6. Lee, J.-M., E.A. Boyle, I.S. Nurhati, M. Pfeiffer, A.J. Meltzner, and B. Suwargadi, *Coral-based history of lead and lead isotopes of the surface Indian Ocean since the mid-20th century*. Earth Planetary Science Letters, 2014. **398**: p. 37-47.
7. Kumar, S., S. Aggarwal, J. Malherbe, J. Barre, S. Berail, P. Gupta, and O. Donard, *Tracing dust transport from Middle-East over Delhi in March 2012 using metal and lead isotope composition*. Atmospheric Environment, 2016. **132**: p. 179-187.
8. Bollhöfer, A. and K. Rosman, *Isotopic source signatures for atmospheric lead: the Southern Hemisphere*. Geochimica et Cosmochimica Acta, 2000. **64**(19): p. 3251-3262.
9. Lee, C.S., X.-D. Li, G. Zhang, J. Li, A.-J. Ding, and T. Wang, *Heavy metals and Pb isotopic composition of aerosols in urban and suburban areas of Hong Kong and Guangzhou, South China—evidence of the long-range transport of air contaminants*. Atmospheric Environment, 2007. **41**(2): p. 432-447.
10. Tan, M., G. Zhang, X. Li, Y. Zhang, W. Yue, J. Chen, .... & Y. Zhang, *Comprehensive study of lead pollution in Shanghai by multiple techniques*. Analytical Chemistry, 2006. **78**(23): p. 8044-8050.
11. Monna, F., J. Lancelot, I.W. Croudace, A.B. Cundy, and J.T. Lewis, *Pb isotopic composition of airborne particulate material from France and the southern United Kingdom: implications for Pb pollution sources in urban areas*. Environmental Science & Technology, 1997. **31**(8): p. 2277-2286.
12. Bing-Quan, Z., C. Yu-Wei, and P. Jian-Hua, *Lead isotope geochemistry of the urban environment in the Pearl River Delta*. Applied Geochemistry, 2001. **16**(4): p. 409-417.
